# Supplementary material for: The Caspase Homologues in Scallop Chlamys farreri and Their Expression Responses to Toxic Dinoflagellates Exposure
Source: Toxins (Basel). 2022 Jan 31;14(2):108. doi: 10.3390/toxins14020108 (PMC8878197; doi:10.3390/toxins14020108)
Supplement: Supplementary file 1 [file toxins-14-00108-s001.zip › Supplementary_Tables.xlsx]

## Sheet: Table_S1
Cfcaspases character
	Scaffold	Gene name	ORF	Amino Acid (aa)	Instability Index(II)	aliphatic index	Grand average of hydropathicity (GRAVY) values	MW (kDa)	pI	SMART Domain Organization	No. exon	CDS status
Initiators Cfcaspase 2/9	evm.model.scaffold60969.34	CF.60969.34-caspase2/9	1335	444	42.46	72.64	-0.617	50.7676	6.31	CARD-CASc	8	complete
	evm.model.scaffold64101.6	CF.64101.6-caspase2/9	1284	427	32.21	74.36	-0.542	49.6238	6.58	CARD-CASc	8	complete
	evm.model.scaffold64101.7	CF.64101.7-caspase2/9	1344	447	40.14	71.07	-0.726	50.983	5.51	CARD-CASc	8	complete
	evm.model.scaffold63423.40	CF.63423.40-caspase2/9	2004	667	45.78	73.67	-0.708	76.2812	6.23	CARD-CASc	9	complete
	evm.model.scaffold12119.1	CF.12119.1-caspase2/9	1158	385	52.16	74.23	-0.564	42.6133	6.38	CARD-CASc	5	complete
	evm.model.scaffold12119.2	CF.12119.2-caspase2/9	1557	518	49.33	69.83	-0.527	57.2413	5.29	CARD-CASc	9	complete
Initiators Cfcaspase 8/10	evm.model.scaffold56545.2	CF.56545.2-caspase8/10	1791	596	45.94	77.05	-0.497	66.1818	5.04	DD-CASc	10	complete
	evm.model.scaffold59425.15	CF.59425.15-caspase8/10	834	277	32.75	78.16	-0.453	31.6867	5.22	CASc	7	complete
	evm.model.scaffold59425.18	CF.59425.18-caspase8/10	1818	605	33.4	65.9	-0.72	67.4458	4.65	DED-DED-CASc	17	complete
	evm.model.scaffold45771.5	CF.45771.5-caspase8/10	2292	763	42.67	81.99	-0.496	86.0121	5.47	DED-DED-CASc	11	complete
	evm.model.scaffold61475.3	CF.61475.3-caspase8/10	1902	633	46.19	83.51	-0.502	72.4877	6.08	DED-DED-CASc	15	complete
	evm.model.scaffold20733.1	CF.20733.1-caspase8/10	1839	612	47.32	77.65	-0.59	68.3101	4.95	DED-DED-CASc	12	complete
Executioners Cfcaspase 3/6/7	evm.model.scaffold4213.1	CF.4213.1-caspase3/6/7	1032	343	47.84	69.59	-0.488	39.0351	5.7	CASc	5	complete
	evm.model.scaffold11121.7	CF.11121.7-caspase3/6/7	1527	508	32.98	82.83	-0.249	56.4074	4.84	CASc	9	complete
	evm.model.scaffold18363.12	CF.18363.12-caspase3/6/7	927	308	37.84	65.49	-0.55	34.2203	5.1	CASc	5	complete
	evm.model.scaffold18363.11	CF.18363.11-caspase3/6/7	981	326	41.85	79.26	-0.541	36.9886	5	CASc	6	complete
	evm.model.scaffold47297.24	CF.47297.24-caspase3/6/7	834	277	39.12	75.63	-0.619	31.3697	8.4	CASc	5	complete
	evm.model.scaffold25603.9	CF.25603.9-caspase3/6/7	870	289	39.28	78.93	-0.473	32.6544	7.46	CASc	6	complete
	evm.model.scaffold61175.1	CF.61175.1-caspase3/6/7	1215	404	47.56	64.9	-1.05	46.6433	5.24	CASc	5	complete
	evm.model.scaffold61175.2	CF.61175.2-caspase3/6/7	1323	440	44.7	68.45	-0.797	50.4187	5.39	CASc	6	complete
	evm.model.scaffold61727.3	CF.61727.3-caspase3/6/7	1479	492	48.73	76.26	-0.508	54.7046	5.8	CASc	6	complete
	evm.model.scaffold24861.4	CF.24861.4-caspase3/6/7	1440	479	52.11	64.7	-1.061	55.3309	5.64	CASc	6	complete
	evm.model.scaffold60987.16	CF.60987.16-caspase3/6/7	1149	382	50.25	74.55	-0.54	43.616	4.88	CASc	4	complete
	evm.model.scaffold61415.1	CF.61415.1-caspase3/6/7	861	286	34.05	85.91	-0.385	32.7107	6.96	CASc	5	complete
	evm.model.scaffold41779.40	CF.41779.40-caspase3/6/7	1398	465	54.85	70.41	-0.534	52.0963	5.67	CASc	6	complete
	evm.model.scaffold41779.42	CF.41779.42-caspase3/6/7	1056	351	52	66.41	-0.758	40.7526	5.15	CASc	3	complete
	evm.model.scaffold60899.92	CF.60899.92-caspase3/6/7	1338	445	34.64	77.71	-0.624	50.4879	5.72	CASc	5	complete
	evm.model.scaffold15073.2	CF.15073.2-caspase3/6/7	1011	336	43.8	67.29	-0.665	37.6761	5.45	CASc	6	complete
	evm.model.scaffold1989.162.1	CF.1989.162.1-caspase3/6/7like	1296	431	41.52	75.99	-0.672	49.6883	6.2	CASc	8	complete
	evm.model.scaffold27679.13	CF.27679.13-caspase3/6/7like	1200	399	40.07	66.19	-0.823	47.2308	8.85	CASc	7	complete

## Sheet: Table_S2
Temporal expression patterns of caspase genes in C. farreri embryo (TPM value)
TPM	Zygote	2-8cell	Blastula	Gastrula	Trochophore	D stage veliger	Early umbo larvae	Middle umbo larvae	Late umbo larvae	Creeping larvae	Juvenile scallops
CF.4213.1-caspase3/6/7	0.74	1.64	2.5	2.51	1.48	4.9	2.44	4.24	2.75	11.5	12.92
CF.11121.7-caspase3/6/7	6.35	5.76	6.57	5.78	3.43	5.54	2.78	3.99	2.64	3.61	3.76
CF.60987.16-caspase3/6/7	4.66	1.18	2.12	0.6	0.44	0.29	0.82	1.09	1.82	3.14	4.19
CF.61415.1-caspase3/6/7	1.78	0.79	0.94	0.2	0.59	0.89	0.37	0.73	0.52	1.2	0.65
CF.41779.40-caspase3/6/7	1.46	1.93	3.3	2.1	4.75	7.93	5.4	4.03	4.69	10.34	12.72
CF.41779.42-caspase3/6/7	3.38	0.96	2.82	0.33	0	0.31	0.6	1.04	1.69	1.96	1.58
CF.60899.92-caspase3/6/7	0	0	0.61	1.03	1.62	4.6	4.46	6.43	6.58	11.83	11.21
CF.15073.2-caspase3/6/7	5.05	4.35	3.22	3.93	2.02	3.37	2.18	1.86	2.36	2.89	2.2
CF.18363.12-caspase3/6/7	1.65	1.46	1.61	1.49	0.28	0.47	1.36	1.18	1.13	2.97	2.2
CF.18363.11-caspase3/6/7	1.56	1.72	3.59	2.29	1.04	1.46	1.12	0.64	1.52	0.53	0.76
CF.47297.24-caspase3/6/7	1.22	1.22	8.61	13.07	7.19	20.94	10.74	11.06	4.83	18.36	13.77
CF.25603.9-caspase3/6/7	0.29	0	0.47	0.2	0	0	0.72	0.18	0.17	1.19	0.43
CF.61175.1-caspase3/6/7	0.63	0.28	0.45	0.28	0	0.18	0	0.13	0.74	0.28	0.76
CF.61175.2-caspase3/6/7	4.82	9.71	3.28	1.31	0.48	0.83	0	0.83	0.34	0.52	1.26
CF.61727.3-caspase3/6/7	0.17	0.46	0.37	0.23	0.43	1.26	0.43	0.74	1.41	1.4	1.88
CF.24861.4-caspase3/6/7	2.3	1.41	1.04	0.84	0.71	0.61	1.75	0.76	0.83	1.19	2.32
CF.1989.162.1-caspase3/6/7like	0	0	0.84	0.67	0.39	0.42	0.24	0.12	0	0.4	0.43
CF.27679.13-caspase3/6/7like	0	0	0	0	0.11	0.09	0.92	0.26	0.5	0.57	0.46
CF.60969.34-caspase2/9	7.65	7.85	7.31	8.68	9.37	11.52	6.71	7.15	8.27	11.34	11.38
CF.64101.6-caspase2/9	22.06	24.22	19.32	4.98	5.56	6.59	6.49	4.26	3.83	13.54	12.12
CF.64101.7-caspase2/9	6.84	5.03	5.75	3.47	4.08	7.27	4.09	3.96	4	7.55	7.85
CF.63423.40-caspase2/9	5.22	5.57	4.06	3.97	2.74	2.47	1.18	1.01	1.34	1.29	0.92
CF.12119.1-caspase2/9	3.31	3.21	1.17	1.34	0.55	0.66	1.36	0.68	0.77	1.04	1.6
CF.12119.2-caspase2/9	1.8	1.74	3.13	1.33	1.97	5.29	4.34	2.81	2.97	8.62	7.73
CF.56545.2-caspase8/10	0	0.19	0.15	0	0.14	0.12	0.18	0.09	0	0	0.31
CF.59425.15-caspase8/10	0	0	0.49	0.83	0.92	0.13	0.57	0.19	0.36	0	0
CF.59425.18-caspase8/10	0	0	0.15	0.29	0.21	0.06	0.26	0.09	0.16	0.09	0.2
CF.45771.5-caspase8/10	1.45	2.95	3.43	3.4	1.73	1.63	1.92	2.39	1.43	3.53	4.44
CF.61475.3-caspase8/10	0	0	0.36	0	0.07	0.12	0.17	0.16	0.16	1.27	1.95
CF.20733.1-caspase8/10	0	0	0.22	0.09	0.07	0.18	0.51	0.09	0.32	0.94	0.6
Expression patterns of caspase genes in adult organs/tissues in C. farreri (TPM value)
TPM	Digestive gland	Kidney	Gill	Blood	Mantle	Eye	Striated muscle	Smooth muscle	Foot	Gonad
CF.4213.1-caspase3/6/7	4.97333	9.30333	10.5967	2.03	14.6867	25.1667	1.49	1.24	5.04333	27.1833
CF.11121.7-caspase3/6/7	12.0533	19.75	22.5433	40.32	19.2367	53.2967	5.01667	6.44667	12.19	12.4633
CF.18363.12-caspase3/6/7	32.4067	0.276667	3.2	1.98333	1.08667	1.19	0.0633333	0.233333	0.196667	0.405
CF.18363.11-caspase3/6/7	2.35	1.50667	4.64	2.78	1.23	2.57333	0.27	0.08	0.983333	0.7
CF.47297.24-caspase3/6/7	11.76	11.5667	28.7533	19.3667	23.7467	35.12	3.22333	4.41667	10.3	10.96
CF.25603.9-caspase3/6/7	9.63	1.00667	2.80667	3.72667	0.646667	2.23	0.08	0.17	0.4	0.141667
CF.61175.1-caspase3/6/7	9.71	9.18333	5.90667	6.88	5.06333	5.52	2.49	1.43	4.38333	2.91333
CF.61175.2-caspase3/6/7	11.06	10.1067	27.5	16.49	12.3767	16.56	3.43	3.31333	6.11667	5.09833
CF.61727.3-caspase3/6/7	9.77	37	29.7867	29.3567	11.58	21.7067	3.97667	4.03333	5.21	2.68167
CF.24861.4-caspase3/6/7	7.43333	13.0367	20.0733	15.8	5.73667	11.12	0.996667	1.31667	2.66333	1.32667
CF.60987.16-caspase3/6/7	36.64	26.7167	51.5733	65.3433	17.93	39.17	3.90333	4.71667	14.88	12.0017
CF.61415.1-caspase3/6/7	5.41333	2.18333	20.9967	7.38667	4.37	10.93	0.206667	0.296667	1.90667	0.571667
CF.41779.40-caspase3/6/7	1.54333	0.48	2.4	1.28	0.6	0.963333	0.07	0.173333	0.206667	1.01667
CF.41779.42-caspase3/6/7	5.10667	5.40333	9.38667	10.9133	3.21	6.41333	0.953333	2.02667	2.64333	4.06
CF.60899.92-caspase3/6/7	0.09	0.423333	1.46333	2.52333	0.78	1.68	0	0.193333	0.186667	1.105
CF.15073.2-caspase3/6/7	2.86667	1.90333	5.07667	3.19333	2.40667	3.76667	0.136667	0.356667	0.683333	1.295
CF.1989.162.1-caspase3/6/7like	1.25	2.99333	4.52	1.82667	1.13333	1.71667	0.66	0.343333	1.04333	0.406667
CF.27679.13-caspase3/6/7like	2.81667	0.9	21.3067	0.196667	1.29667	0.866667	0.0633333	0	0.39	0.646667
CF.60969.34-caspase2/9	17.1033	16.38	27.6733	34.98	13.6967	21.9267	5.31	7.25	11.08	12.5417
CF.64101.6-caspase2/9	17.49	22.4767	54.16	43.4667	22.0433	32.7667	2.80667	4.2	7.87667	9.06667
CF.64101.7-caspase2/9	9.16667	11.14	28.4067	18	11.0467	20.1867	2.32	2.88	4.41667	3.175
CF.63423.40-caspase2/9	1.55	2.54667	3.99667	3.01667	2.37	2.36667	1.08	0.866667	1.78	4.81333
CF.12119.1-caspase2/9	4.82333	4.49667	10.8433	10.4033	5.13333	6.71667	2.06	1.73667	3.53667	3.26167
CF.12119.2-caspase2/9	10.16	6.26	17.8833	9.08333	7.25	13.25	2.32	2.55333	5.04	4.05667
CF.56545.2-caspase8/10	0.606667	1.00667	2.35667	1.61333	1	1.3	0.11	0.133333	0.503333	0.338333
CF.59425.15-caspase8/10	1.87333	2.72667	43.9933	5.48333	9.16333	8.30333	0.253333	0.156667	1.49667	0.748333
CF.59425.18-caspase8/10	3.47333	1.09667	10.7933	1.97667	4.98	7	0.04	0.02	0.8	0.14
CF.45771.5-caspase8/10	7.23667	11.67	15.8167	17.9733	8.47333	16.3433	2.94	3.38	5.83667	5.615
CF.61475.3-caspase8/10	20.09	2.37667	41.82	3.59667	8.39333	4.87	0.15	0.103333	0.336667	0.66
CF.20733.1-caspase8/10	35.41	10.0167	29.4467	5.60667	5.95333	6.50667	0.22	0.48	2.79667	0.85

## Sheet: Table_S3
	hepatopancreas												Kidneys
log2 FC	AM-Day1	AM-Day3	AM-Day5	AM-Day10	AM-Day15		ACDH-Day1	ACDH-Day3	ACDH-Day5	ACDH-Day10	ACDH-Day15		AM-Day1	AM-Day3	AM-Day5	AM-Day10	AM-Day15		ACDH-Day1	ACDH-Day3	ACDH-Day5	ACDH-Day10	ACDH-Day15
CF.61727.3-caspase3/6/7	1.71431	0.455696	1.22782	4.89016	0.170125		0.560283	0.771584	1.06831	4.64817	2.38321		1.88963	1.40596	0.469991	4.53609	0.760222		-0.115783	-0.372975	0.20597	2.73841	3.1857
CF.60899.92-caspase3/6/7	-0.30677	0.560799	0.88012	0.675658	1.10608		-0.0520574	0.884024	0.53808	0.420666	0.240888		0.221409	-0.168023	0.27165	0.679559	0.624292		0.445743	-0.171223	0.268696	0.315899	-0.956539
CF.24861.4-caspase3/6/7	0.643344	0.592255	0.389185	1.07968	0.557482		0.306839	0.207229	0.286318	0.47368	-0.0993369		0.915522	0.717314	-0.837998	1.38087	0.092238		0.0445912	0.638919	-0.810072	0.499464	-0.815466
CF.61175.1-caspase3/6/7	0.0969488	-0.499335	-0.268926	-0.0629046	0.334825		-1.70644	-0.737218	-0.619475	-0.443731	-0.199281		0.635633	0.251687	-0.295686	0.43996	0.34201		-1.06482	-0.670249	-0.706537	-0.41945	0.0409278
CF.61175.2-caspase3/6/7	-0.169928	0.401466	0.129991	-0.0936415	0.0460016		-0.423427	-0.379403	-0.18288	-0.19327	-0.164269		1.49552	-0.148133	0.390842	1.2111	0.889391		0.479445	1.1762	0.32028	0.933208	0.0673562
CF.60987.16-caspase3/6/7	-0.420088	1.06193	0.569604	0.745959	0.433477		-0.468591	0.788303	0.516086	-0.281493	-0.738111		0.118477	0.516445	-0.303014	0.944327	1.23471		-1.50932	0.572813	0.617121	0.43799	0.251374
CF.41779.42-caspase3/6/7	-1.004	-1.93545	-0.446426	-0.252495	-0.319954		-1.16273	0.202876	-0.731599	-0.482666	-1.10734		0.639748	0.313966	0.63835	1.47455	1.51079		-1.66006	0.653709	0.435028	0.880476	0.30664
CF.41779.40-caspase3/6/7	-0.36385	-0.312153	-0.444822	0.133883	0.030773		-0.485501	0.224389	-0.448651	-0.0341497	-0.4226		-0.474843	0.328511	-0.132673	1.1502	0.647495		0.53107	0.63176	-0.366789	-0.012061	-0.794161
CF.15073.2-caspase3/6/7	-0.300028	-0.238927	-0.0164945	-0.174583	0.253325		-0.184568	0.565884	0.120077	0.308086	-6.51e-05		-0.481822	-0.732553	-1.51418	-0.645003	-1.10361		-0.653073	-0.12272	-0.277207	-0.252159	-1.00259
CF.25603.9-caspase3/6/7	-1.43883	-0.353134	-1.44007	-0.461581	-0.51402		-1.18669	-0.751574	-0.761402	-0.72744	-1.34954		0.584281	0.330087	-1.96264	0.621796	0.296481		-0.71439	-0.00133469	-0.00415823	0.0815608	-0.0494778
CF.61415.1-caspase3/6/7	-1.28172	0.184005	-0.297327	-0.0416287	-0.521053		-1.06425	-0.863943	-0.742935	-0.593498	-0.274376		-1.88775	-1.48687	-3.31021	-1.42174	-2.87685		-4.23218	-1.59723	-1.31094	-0.704639	-1.06924
CF.47297.24-caspase3/6/7	-0.384006	-0.160235	-0.439309	-0.183799	-0.142813		-0.400047	-1.07425	-1.11098	-0.506189	-0.521718		-0.124785	-0.248966	-0.999667	0.359291	-0.747158		-0.693572	-0.622874	-0.745773	-0.209987	-1.01222
CF.18363.12-caspase3/6/7	-0.177943	-0.144395	0.423482	-0.173883	-0.266451		-0.6526	-0.393781	-0.230901	0.128137	-0.660972		-0.443586	-0.282957	0.836913	0.140783	0.374796		0.2434	-0.709397	-1.65279	0.0767899	-0.873178
CF.18363.11-caspase3/6/7	-1.23007	-1.04042	-0.930679	-1.02249	-0.757643		-1.60989	-1.56204	-1.70602	-0.882066	-1.68647		-0.878391	-1.12163	-0.64223	-0.148997	0.901097		-0.146508	-1.01949	-0.893061	0.380158	-1.41996
CF.11121.7-caspase3/6/7	-0.604337	0.00519056	-0.128069	0.169842	-0.595752		-0.105494	-0.345481	-0.363798	-0.603644	-0.130159		0.184068	0.250757	0.0250731	0.48165	0.733282		0.546419	0.17916	0.327632	0.714352	0.398342
CF.4213.1-caspase3/6/7	-0.305379	-0.0916033	0.105211	-0.152088	-0.162358		0.351641	0.981883	-0.543165	0.26441	-0.059964		1.69727	0.703727	0.613422	-0.862508	-0.0512157		0.656645	0.888476	-0.361272	1.02332	0.738864
CF.1989.162.1-caspase3/6/7like	-0.797867	-0.631005	0.232149	-0.0744916	-0.0764193		-0.581046	-0.602662	0.236301	-0.23701	0.0415176		-0.115585	-0.958225	-0.0367157	0.0836187	0.286543		-0.855072	-0.213773	-0.206175	-0.401824	-0.665911
CF.27679.13-caspase3/6/7like	0.102607	-0.0852088	0.810218	1.58483	1.98306		-1.08955	0.871094	0.551796	1.3529	0.0149263		-1.26448	-0.532909	-2.6623	-4.18288	-0.940564		-4.23621	-2.12536	-0.758883	-0.355598	-1.61502
CF.12119.2-caspase2/9	-0.189808	0.22208	0.354357	0.203063	-0.195459		-0.342991	-0.45287	-0.455443	-0.058947	0.0733626		1.28941	1.74123	2.49364	2.35262	1.35979		1.98171	0.433554	1.06056	1.61039	1.36724
CF.12119.1-caspase2/9	-0.350383	-0.166477	-0.274038	-0.343767	-0.233226		-0.784044	-0.23435	-0.382274	-0.265857	-0.446242		-0.501115	-0.608556	0.211368	-0.061644	0.277474		-0.0786691	-1.06254	-0.65808	-0.080648	-0.396914
CF.64101.6-caspase2/9	0.167199	0.592139	0.371876	0.588657	0.63536		0.495321	0.116679	0.473871	0.513515	0.267187		-0.113258	0.894693	-0.865303	0.0421389	-0.595239		0.316516	-0.174734	0.212618	0.74604	0.378556
CF.64101.7-caspase2/9	-0.582419	0.171074	-0.122047	0.411486	-0.613795		-0.357386	-0.508703	-0.598561	-0.511546	0.327614		-0.139944	0.314093	-0.0676829	0.593721	-1.1228		-0.484006	0.268555	0.161261	0.437103	0.407452
CF.60969.34-caspase2/9	0.23702	0.479093	0.498413	0.592846	0.475086		0.093197	0.123077	0.299145	0.477854	0.292356		0.593565	0.737583	0.440239	0.671974	0.709473		0.999082	-0.134155	0.203879	0.90864	-0.677998
CF.63423.40-caspase2/9	-0.577698	-0.089863	0.0317565	-0.14351	0.167991		-0.1866	-0.0647396	0.25831	0.298797	0.132689		-0.270461	0.339942	0.258167	-0.597232	1.09136		-0.0474016	-0.0475505	0.0709199	-0.064856	0.107323
CF.20733.1-caspase8/10	-1.12715	-1.01231	-0.928396	0.0576797	-0.926602		-0.585887	-0.650306	-1.13635	-0.958259	-1.7994		1.26767	-0.157322	-1.6289	-0.559379	-1.78546		0.143499	-0.51564	-0.658328	0.159755	-0.57724
CF.59425.18-caspase8/10	-0.490417	0.571725	-0.135077	1.28297	0.159729		0.117866	-0.223158	0.302908	0.0212744	-0.593756		-0.710827	-1.47622	-2.88242	-3.54433	-0.0576407		-2.50422	-1.47361	-1.03146	-0.822924	-0.91863
CF.59425.15-caspase8/10	-0.444201	-0.530447	1.17225	0.362735	-1.35784		-1.40388	-1.16855	-1.94056	-2.93939	1.41567		0.720763	1.10862	-0.598397	-2.10535	-2.18643		0.858723	-1.44136	-0.549773	-0.309643	0.879054
CF.61475.3-caspase8/10	-0.479612	-0.126742	0.308668	0.592218	-0.313277		-0.137774	-0.290266	0.0187186	0.311802	-1.33372		0.301617	0.298969	-1.11286	-0.840161	-0.453947		-1.50443	0.00627322	0.831509	0.0563813	-0.226126
CF.56545.2-caspase8/10	-0.0654596	0.0336022	0.443767	-0.034018	-0.259533		0.662529	0.0871503	-1.09801	-0.793784	0.499652		-0.572993	-0.278959	-0.478618	0.737747	1.77631		1.81111	1.28224	-1.37699	-0.509572	0.120371
CF.45771.5-caspase8/10	0.168612	0.161353	-0.113185	0.274428	0.130299		0.134557	0.0259156	-0.0941372	0.0149128	0.174383		0.599146	0.761303	0.0492898	0.509341	0.599825		1.0689	1.02025	0.469826	1.19569	0.0657754
	The green background represents a significant up-regulated and the red background represents a significant down-regulated
	hepatopancreas												Kidneys
Pvalue	AM-Day1	AM-Day3	AM-Day5	AM-Day10	AM-Day15		ACDH-Day1	ACDH-Day3	ACDH-Day5	ACDH-Day10	ACDH-Day15		AM-Day1	AM-Day3	AM-Day5	AM-Day10	AM-Day15		ACDH-Day1	ACDH-Day3	ACDH-Day5	ACDH-Day10	ACDH-Day15
CF.24861.4-caspase3/6/7	0.204471	0.270061	0.417712	0.0297025	0.253647		0.526981	0.686819	0.659396	0.339223	0.893797		0.213324	0.3771	0.282677	0.118626	0.89698		0.959772	0.43981	0.336166	0.530717	0.368799
CF.41779.40-caspase3/6/7	0.727144	0.520018	0.782887	0.351587	0.290983		0.578941	0.289704	0.729716	0.300109	0.329171		0.138741	0.769243	0.603321	0.320402	0.117997		0.0559405	0.394723	0.520438	0.9035	0.138982
CF.41779.42-caspase3/6/7	0.163652	0.00839308	0.447797	0.69219	0.59518		0.0534269	0.731533	0.23678	0.424575	0.0830372		0.68131	0.836201	0.659389	0.264764	0.249131		0.361209	0.653463	0.769113	0.536098	0.838592
CF.60899.92-caspase3/6/7	0.533814	0.292302	0.077737	0.168852	0.0259367		0.905221	0.1065	0.23825	0.416136	0.638472		0.728823	0.810209	0.69441	0.285505	0.325511		0.535779	0.804335	0.702829	0.643426	0.190226
CF.60987.16-caspase3/6/7	0.492516	0.105835	0.225755	0.206948	0.347597		0.330512	0.0777465	0.393348	0.622059	0.134675		0.93017	0.65844	0.794698	0.364258	0.190517		0.334973	0.607245	0.577145	0.696039	0.823822
CF.61175.1-caspase3/6/7	0.879293	0.474666	0.683431	0.922575	0.567285		0.0347142	0.293975	0.361698	0.518865	0.772259		0.445566	0.795768	0.747982	0.628012	0.656137		0.331817	0.474485	0.441965	0.657038	0.962261
CF.61175.2-caspase3/6/7	0.745496	0.500295	0.798684	0.859654	0.926345		0.453533	0.476969	0.725014	0.722319	0.767391		0.043445	0.876022	0.609284	0.0998548	0.258718		0.581946	0.127712	0.702134	0.225314	0.934633
CF.61727.3-caspase3/6/7	0.267952	0.78451	0.445425	0.00142681	0.91855		0.736009	0.640153	0.511048	0.000462314	0.0992121		0.255036	0.389573	0.777644	0.00542612	0.647966		0.947816	0.800898	0.90019	0.0616095	0.0269835
CF.15073.2-caspase3/6/7	0.552448	0.657369	0.973828	0.710264	0.57514		0.684694	0.234312	0.798346	0.511785	0.999981		0.523251	0.356333	0.0657335	0.477893	0.155054		0.471861	0.877461	0.725536	0.741693	0.225023
CF.11121.7-caspase3/6/7	0.171147	0.990906	0.76767	0.716658	0.181684		0.805951	0.438769	0.409872	0.213125	0.792798		0.769613	0.748432	0.968349	0.47589	0.216006		0.542813	0.817013	0.619751	0.27935	0.603562
CF.18363.11-caspase3/6/7	0.0251613	0.0798407	0.0795634	0.0581319	0.163947		0.00535051	0.00813896	0.00321574	0.1695	0.00991621		0.144464	0.0934949	0.329323	0.813998	0.232666		0.840627	0.153543	0.20113	0.64196	0.0418385
CF.18363.12-caspase3/6/7	0.700874	0.755265	0.364973	0.699346	0.529158		0.13612	0.377063	0.638915	0.778049	0.185525		0.464851	0.650417	0.261583	0.837398	0.541456		0.73567	0.344134	0.027542	0.907725	0.210319
CF.61415.1-caspase3/6/7	0.0430636	0.743294	0.609042	0.944023	0.348104		0.0788503	0.170025	0.210133	0.302363	0.679045		0.0415288	0.100407	0.00138709	0.114393	0.00300914		0.00273048	0.085658	0.127163	0.403994	0.197815
CF.47297.24-caspase3/6/7	0.415814	0.762248	0.334008	0.679933	0.743008		0.370489	0.023803	0.0156759	0.30445	0.357242		0.871074	0.709236	0.0934083	0.654018	0.296421		0.354551	0.381306	0.277108	0.755136	0.172745
CF.25603.9-caspase3/6/7	0.00656768	0.545656	0.00614983	0.337667	0.266102		0.0183663	0.140979	0.148004	0.135963	0.0193062		0.52088	0.727654	0.0813912	0.516651	0.77111		0.511987	0.99884	0.996761	0.928037	0.958948
CF.4213.1-caspase3/6/7	0.643181	0.88177	0.850606	0.806088	0.795556		0.516048	0.0677123	0.389289	0.640785	0.927982		0.103187	0.457234	0.462454	0.354344	0.948741		0.450491	0.286674	0.680382	0.198842	0.429285
CF.1989.162.1-caspase3/6/7like	0.307481	0.413871	0.724396	0.922708	0.911461		0.447506	0.423207	0.732245	0.742101	0.954612		0.886229	0.281252	0.961054	0.910604	0.671275		0.363492	0.78712	0.791621	0.632109	0.412964
CF.27679.13-caspase3/6/7like	0.902087	0.918538	0.246587	0.0384334	0.0275972		0.259592	0.344547	0.488032	0.0632043	0.986947		0.129132	0.561609	0.00513142	0.000322448	0.214878		0.00229597	0.0255825	0.390985	0.646458	0.060809
CF.60969.34-caspase2/9	0.579526	0.300586	0.226107	0.186077	0.270511		0.822532	0.77492	0.496798	0.267804	0.551595		0.341641	0.300714	0.416915	0.281678	0.200177		0.152834	0.844468	0.743173	0.150809	0.304389
CF.64101.6-caspase2/9	0.695323	0.204299	0.399926	0.176428	0.124715		0.235725	0.793735	0.280132	0.243002	0.59655		0.856432	0.182023	0.127692	0.957439	0.374211		0.643243	0.782313	0.7422	0.220933	0.600391
CF.64101.7-caspase2/9	0.263352	0.762492	0.815896	0.474678	0.213641		0.494596	0.323299	0.259893	0.329365	0.592644		0.81814	0.638996	0.926895	0.452569	0.0943944		0.516143	0.70578	0.79963	0.525376	0.553366
CF.63423.40-caspase2/9	0.77757	0.716231	0.719901	0.724797	0.721623		0.934693	0.669546	0.952504	0.963575	0.974836		0.769376	0.692134	0.734552	0.492917	0.172699		0.769376	0.692134	0.734552	0.492917	0.172699
CF.12119.1-caspase2/9	0.481768	0.742253	0.568972	0.506373	0.628887		0.117896	0.628752	0.445795	0.582435	0.412262		0.531396	0.487268	0.751951	0.934026	0.700444		0.925604	0.201408	0.393451	0.919792	0.607673
CF.12119.2-caspase2/9	0.730229	0.689899	0.500433	0.691874	0.701976		0.503261	0.398637	0.392354	0.913578	0.897911		0.0793119	0.0151658	0.00189236	0.000969222	0.0579962		0.0140894	0.608556	0.203462	0.0349467	0.0539649
CF.56545.2-caspase8/10	0.947659	0.972893	0.631631	0.973048	0.802061		0.458465	0.928913	0.349535	0.48155	0.59929		0.705172	0.837639	0.724032	0.529622	0.0756522		0.114826	0.28506	0.361402	0.712309	0.924475
CF.45771.5-caspase8/10	0.710531	0.733543	0.796134	0.520707	0.766709		0.751932	0.953289	0.834591	0.973964	0.72801		0.352256	0.252037	0.938375	0.434349	0.353982		0.140818	0.130824	0.503818	0.0663373	0.928645
CF.61475.3-caspase8/10	0.524952	0.867201	0.65286	0.372684	0.643529		0.851847	0.660639	0.982571	0.64491	0.0735083		0.704764	0.755937	0.253676	0.39103	0.573728		0.179514	0.994958	0.296749	0.951311	0.801153
CF.20733.1-caspase8/10	0.0316988	0.0892079	0.061123	0.918803	0.0663642		0.231168	0.203797	0.0326549	0.0670137	0.00396412		0.22917	0.892958	0.189873	0.610604	0.162948		0.89615	0.63715	0.557435	0.876786	0.611373
CF.59425.15-caspase8/10	0.59472	0.541379	0.173946	0.63138	0.141307		0.126849	0.183472	0.0482855	0.00997967	0.201658		0.543471	0.338362	0.603641	0.140098	0.127404		0.455503	0.273601	0.635486	0.791883	0.368686
CF.59425.18-caspase8/10	0.602211	0.468578	0.877823	0.0785424	0.857004		0.890193	0.802987	0.71709	0.980443	0.543933		0.433778	0.177733	0.00949006	0.00441097	0.940853		0.0448211	0.139679	0.258699	0.403461	0.307064
